# Supplementary material for: A Toxoplasma gondii Ortholog of Plasmodium GAMA Contributes to Parasite Attachment and Cell Invasion
Source: PubMed Central journal article supplement (PMC4863602; doi:10.1128/msphere.00012-16), 2016-02-10

Figure S1

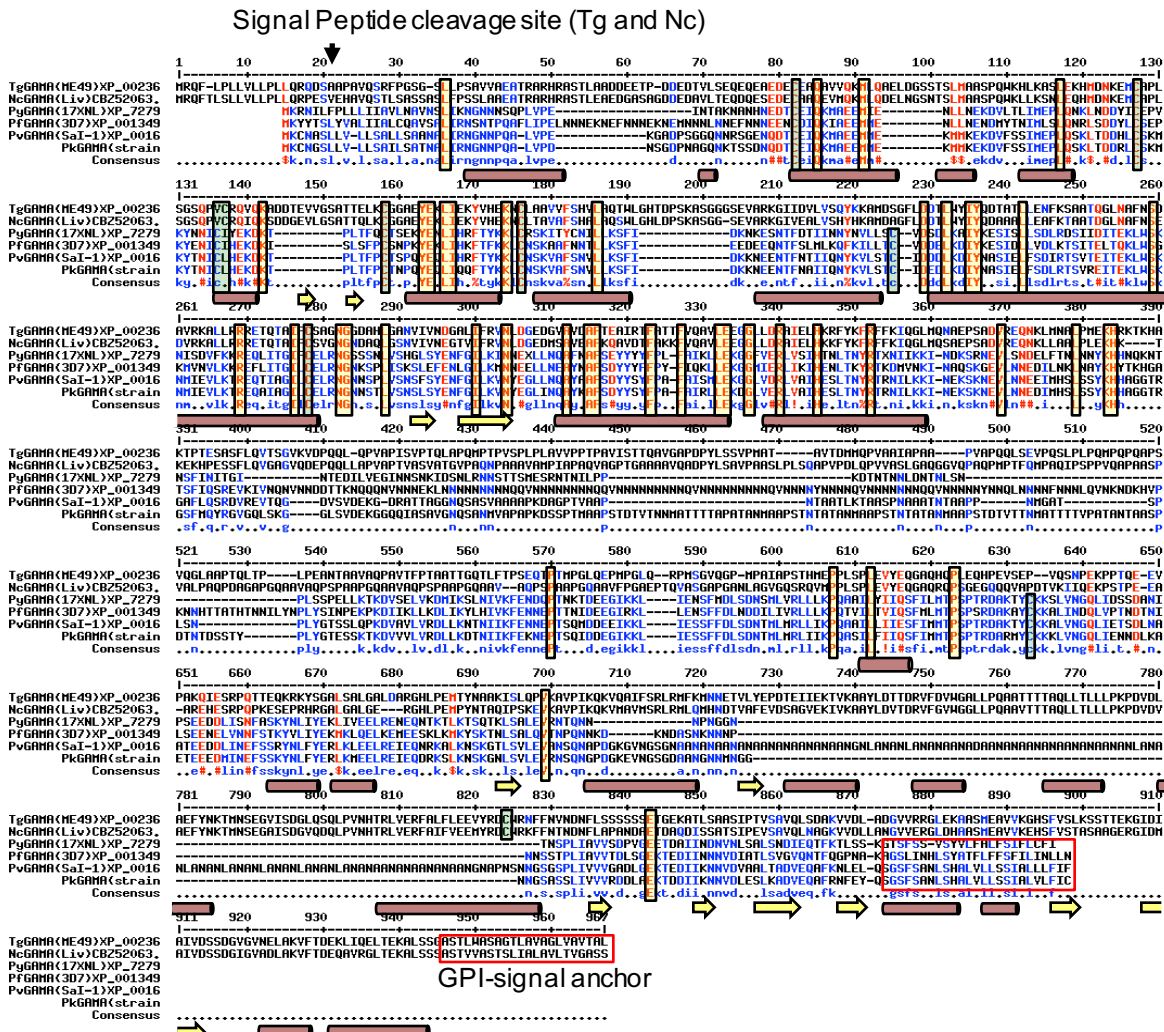

Supplement: sph001162017sf1.pdf [file sph001162017sf1.pdf]
